# Supplementary material for: Potential of conventional & bispecific broadly neutralizing antibodies for prevention of HIV-1 subtype A, C & D infections
Source: PLoS Pathog. 2018 Mar 5;14(3):e1006860. doi: 10.1371/journal.ppat.1006860 (PMC5854441; doi:10.1371/journal.ppat.1006860)
Supplement: S2 Data — (XLSX) [file ppat.1006860.s010.xlsx]

## Sheet: Sheet1
	Titers in TZMBl assay (ug/ml)
	VRC01			VRC07-523-LS			3BNC117			N6			10-1074			PGT121			CAP256-VRC26.25			PGDM1400			10E8V2.0/iMab			3BNC117/PGT135
Virus ID	IC50	IC80		IC50	IC80		IC50	IC80		IC50	IC80		IC50	IC80		IC50	IC80		IC50	IC80		IC50	IC80		IC50	IC80		IC50	IC80
Du422.1	>10	>10		0.978	7.911		>50	>50		0.021	0.079		0.047	0.113		0.01	0.044		0.001	0.055		0.694	>50		0.001	0.003		>25	>25
ZM197M.PB7	0.45	1.62		0.093	0.421		0.22	1.03		0.08	0.24		>10	>10		>50	>50		<0.0003	0.004		0.063	0.285		0.001	0.004		0.185	0.844
ZM214M.PL15	0.63	3.64		0.05	0.296		0.06	0.52		0.043	0.266		0.415	2.97		0.207	1.567		0.008	>25		>50	>50		0.008	0.032		0.093	0.396
ZM233M.PB6	1.67	6.37		0.035	0.215		0.13	0.85		0.039	0.179		0.058	0.371		1.359	7.19		<0.0003	<0.0003		<0.001	0.001		0.001	0.002		0.028	0.064
ZM135M.PL10a	0.58	2.72		0.033	0.13		0.03	0.13		0.015	0.042		0.061	0.263		0.312	1.892		>25	>25		>50	>50		0.0002	0.001		0.06	0.206
CAP45.2.00.G3	>10	>10		0.02	0.088		3.88	>50		0.019	0.067		>10	>10		0.769	24.187		<0.0003	0.001		<0.001	0.002		0.001	0.004		0.182	0.634
CAP244.2.00.D3	0.3	1.89		0.138	0.507		0.12	0.459		0.076	0.279		>20	>20		>50	>50		>25	>25		9.013	>50		0.012	0.041		0.129	0.443
ZM215F.PB8	0.17	0.86		0.041	0.138		0.018	0.087		0.092	0.324		0.028	0.09		0.008	0.036		>25	>25		0.008	0.165		0.001	0.005		0.02	0.053
ZM106F.PB9	0.19	0.83		0.018	0.061		0.06	0.222		0.021	0.063		0.008	0.025		0.002	0.009		0.002	0.013		0.009	0.04		1.458	>10		0.042	0.098
0041.v3.c18	0.36	1.34		0.058	0.198		0.1	0.213		0.103	0.285		>20	>20		1.866	26.682		0.008	0.332		<0.001	0.001		0.001	0.003		0.031	0.151
0984.v2.c2	1.49	>10		0.282	1.035		>20	>20		0.272	1.319		0.954	5.375		0.27	2.065		>25	>25		12.572	>50		0.003	0.007		0.08	0.273
6040.v4.c15	0.15	0.53		0.062	0.207		0.032	0.187		0.049	0.179		>20	>20		>50	>50		<0.0003	0.009		0.003	0.01		0.004	0.015		0.04	0.096
6631.v3.c10	>10	>10		0.121	0.704		>20	>20		0.068	0.241		0.341	1.539		32.075	>50		>25	>25		>50	>50		0.004	0.007		>25	>25
933.v4.c4	0.91	>10		0.554	22.33		>20	>20		0.023	0.065		>20	>20		>50	>50		<0.0003	0.01		>50	>50		>10	>10		>25	>25
6980.v0.c31	0.1	0.33		0.036	0.118		0.072	0.195		0.012	0.04		>20	>20		0.171	1.177		<0.0003	<0.0003		0.01	0.049		0.011	0.044		0.037	0.166
3426.v5.c17	0.26	1.4		0.067	0.18		0.049	0.2		0.034	0.126		0.008	0.024		0.007	0.033		0.02	2.814		0.001	0.003		0.001	0.004		0.055	0.155
Ce1172_H1	>10	>10		>25	>25		>50	>50		0.53	2.539		0.019	0.083		0.021	0.061		3.188	>25		0.021	0.06		0.012	0.042		>25	>25
Ce703010131_1E2	>10	>10		0.028	0.092		0.287	2.381		0.02	0.085		>20	>20		>50	>50		0.005	6.488		0.006	0.028		0.003	0.009		0.055	0.22
Ce703010054_2A2	0.53	1.84		0.091	0.306		0.37	1.67		0.108	0.309		>10	>10		>50	>50		0.033	>25		0.015	0.26		0.0004	0.001		0.111	0.505
Ce0665_F2	0.48	1.75		0.148	0.701		0.125	0.5		0.092	0.304		0.114	0.276		0.065	0.177		>25	>25		48.627	>50		<0.0001	0.001		0.042	0.155
Ce2052_G10	0.18	0.59		0.016	0.081		0.048	0.131		0.043	0.119		>20	>20		>50	>50		<0.0003	<0.0003		0.003	0.011		0.0005	0.002		0.036	0.163
Ce704810053_2B7	>10	>10		0.069	0.275		1.582	9.119		0.072	0.255		>20	>20		>50	>50		<0.0003	<0.0003		0.003	0.009		0.003	0.01		0.295	1.696
CeCAP210_TA5	>10	>10		0.921	4.344		5.72	>20		50	>50		>20	>20		5.554	47.63		<0.0003	<0.0003		0.034	0.475		0.054	0.265		0.095	0.457
CeCAP200_B8a	0.48	1.76		0.085	0.294		0.142	0.441		0.066	0.182		0.025	0.07		0.004	0.016		0.002	0.311		0.2	1.841		0.001	0.003		0.078	0.351
CeCAP188_1_D1_14(Rev-)	0.18	0.62		0.014	0.049		1.364	16.567		0.01	0.029		>20	>20		1.99	13.275		>25	>25		>50	>50		0.002	0.007		0.102	0.398
CeCAP177_1A3	0.15	0.5		0.017	0.077		0.527	>20		0.011	0.027		>20	>20		0.077	0.617		<0.0003	0.012		2.674	20.76		0.001	0.002		0.441	6.555
ZM249M.PL1	0.06	0.2		0.02	0.068		0.03	0.11		0.025	0.069		>10	>10		>50	>50		<0.0003	0.009		0.016	0.701		0.023	0.125		0.077	0.206
7060101641A7(Rev-)	0.24	0.82		0.024	0.088		18.871	>20		0.036	0.106		0.033	0.114		0.016	0.073		<0.0003	0.002		0.005	0.008		0.001	0.003		0.154	3.115
235080_3G7env2(Rev-)	8.41	>10		0.004	0.013		>20	>20		0.028	0.062		0.001	0.004		<0.001	0.003		<0.0003	<0.0003		0.001	0.006		0.001	0.003		>25	>25
704010042	0.16	0.6		0.009	0.087		0.04	0.111		0.046	0.144		>20	>20		>50	>50		<0.0003	<0.0003		<0.001	<0.001		0.003	0.009		0.024	0.091
705010185	>10	>10		0.262	1.047		0.05	0.147		0.444	1.236		>20	>20		>50	>50		0.211	>25		0.988	3.522		0.005	0.014		0.05	0.185
1245045	3.44	>10		0.312	1.547		3.298	>20		0.904	4.006		>20	>20		>50	>50		<0.0003	0.009		0.006	0.025		0.005	0.019		0.395	1.547
19157834_V1	0.35	1.63		0.032	0.177		0.041	0.17		0.015	0.07		0.019	0.061		0.006	0.029		0.005	2.664		>50	>50		0.002	0.005		0.04	0.133
2969249	1.37	>10		0.222	1.759		0.64	3.509		0.28	1.857		>20	>20		>50	>50		>25	>25		>50	>50		0.001	0.004		0.242	0.936
3514597	0.5	2.28		0.054	0.241		0.038	0.51		0.022	0.078		0.099	0.293		0.024	0.091		<0.0003	<0.0003		0.008	0.066		0.051	0.254		0.043	0.103
20258279_V2	0.54	1.95		0.104	0.502		0.303	1.037		0.069	0.239		0.053	0.185		2.324	10.001		>25	>25		>50	>50		0.007	0.017		0.057	0.159
20915593	>10	>10		0.075	1.388		>20	>20		0.006	0.029		0.58	2.807		1.2	5.595		<0.0003	0.001		0.001	0.006		0.007	0.019		>25	>25
20927783	>10	>10		>25	>25		>20	>20		0.702	3.581		4.152	>20		0.094	0.553		0.005	0.234		0.006	0.081		0.002	0.006		>25	>25
20965238	1.1	3.81		0.083	0.422		0.157	1.033		0.069	0.259		>20	>20		>50	>50		0.517	>25		>50	>50		0.008	0.03		0.084	0.406
21197826_V1	>10	>10		0.366	1.86		>20	>20		0.313	1.24		0.551	1.889		0.88	4.309		>25	>25		46.913	>50		0.003	0.007		0.769	4.439
21283649	0.31	1.48		0.027	0.136		0.165	0.564		0.042	0.135		>20	>20		>50	>50		>25	>25		18.207	>50		0.012	0.044		0.116	0.421
2768732_C5_16	1.6	4.42		0.198	0.781		0.304	1.142		0.271	1.302		>20	>20		>50	>50		0.02	>25		0.376	5.946		0.1	0.307		0.19	0.83
18814602_H8_F3	0.02	0.11		0.005	0.023		0.007	0.031		0.004	0.011		0.006	0.015		<0.001	0.003		<0.0003	<0.0003		<0.001	0.001		0.006	0.022		0.008	0.026
19252094_A5_G2	0.47	1.72		0.109	0.556		5.147	>20		0.059	0.21		0.033	0.12		0.019	0.125		<0.0003	<0.0003		<0.001	0.001		0.006	0.016		0.206	2.083
19707346_E8_C6	1.73	6.28		0.074	0.238		19.801	>20		0.04	0.121		>20	>20		>50	>50		<0.0003	0.003		0.008	0.033		0.0003	0.001		0.237	1.237
20104663_E11_D2	>10	>10		0.628	9.766		>20	>20		0.015	0.059		0.005	0.013		0.006	0.019		<0.0003	<0.0003		0.002	0.009		0.006	0.017		>25	>25
20198102_E9_G1	0.16	0.54		0.035	0.126		0.366	>20		0.053	0.176		0.196	0.845		0.392	1.801		<0.0003	<0.0003		0.011	0.049		0.006	0.026		0.071	0.492
20286961_C1_H8	0.4	1.77		0.113	0.409		0.13	0.458		0.144	0.355		>20	>20		1.258	14.15		<0.0003	<0.0003		1.591	>50		0.003	0.007		0.063	0.339
20883229_C9_H6	0.4	1.75		0.024	0.091		18.336	>20		0.015	0.039		0.006	0.025		0.046	0.214		>25	>25		>50	>50		0.006	0.029		0.188	1.346
21203310_G7_C3	>10	>10		1.055	9.005		5.812	18.724		2.063	8.817		0.043	0.271		0.063	0.283		<0.0003	0.001		50	>50		0.002	0.01		0.166	0.742
21492713_B11_E3	0.14	0.55		0.021	0.077		0.089	0.354		0.066	0.227		0.015	0.049		<0.001	0.014		>25	>25		>50	>50		0.002	0.01		0.031	0.118
21502011_F12_E2	9.77	>10		0.605	2.927		1.582	5.924		0.372	1.817		0.016	0.075		0.016	0.047		>25	>25		>50	>50		0.001	0.005		0.093	0.331
21561324_D3_B5	0.44	2.05		0.019	0.057		6.983	>20		0.005	0.017		0.004	0.009		0.077	0.618		0.013	2.083		0.299	2.752		0.01	0.025		0.039	0.182
19314479_A2_5	0.84	3.37		0.062	0.282		0.046	0.166		0.053	0.248		>20	>20		>50	>50		<0.0003	<0.0003		<0.001	0.003		0.004	0.016		0.066	0.245
234-F1-16-57	>10	>10		1.352	8.883		>20	>20		0.039	0.104		>20	>20		0.534	2.81		<0.0003	<0.0003		0.001	0.003		0.003	0.008		>25	>25
541-F1_A7_2	0.17	0.6		0.023	0.072		0.07	0.246		0.032	0.09		>20	>20		>50	>50		<0.0003	0.046		0.016	0.055		0.005	0.016		0.071	0.253
569-F1_37_10	0.3	1.52		0.016	0.115		0.226	1.069		0.041	0.114		0.869	5.453		>50	>50		>25	>25		>50	>50		0.003	0.009		0.029	0.117
556_F2_3_25	3.32	>10		0.173	0.908		4.418	>20		0.151	0.527		0.078	0.261		0.041	0.145		>25	>25		>50	>50		0.003	0.012		0.273	3.705
CAP69.1.12_TA7.1	>10	>10		0.047	0.485		>20	>20		0.025	0.069		0.024	0.069		0.007	0.031		<0.0003	<0.0003		0.022	0.155		0.002	0.004		0.111	0.416
CAP136.1.16_E6_1	>10	>10		0.17	1.974		0.253	1.641		0.087	0.528		0.05	0.165		0.056	0.198		>25	>25		>50	>50		0.002	0.009		0.069	0.761
CAP174.1.06_F3_1B	0.05	0.84		0.002	0.008		19.454	>20		0.007	0.083		0.009	0.028		0.003	0.013		>25	>25		>50	>50		>10	>10		0.009	0.038
CAP225.1.06_A2_18	1.17	4.74		5.152	>25		6.174	>20		13.232	>50		0.25	0.914		0.575	2.551		>25	>25		0.544	7.076		0.002	0.006		0.22	1.877
CAP266.2.00_E9_h6	>10	>10		>25	>25		>20	>20		0.009	0.025		>20	>20		>50	>50		0.001	0.146		0.292	1.466		0.021	0.068		>25	>25
TRP290.2.00_23_6	1.98	>10		0.095	0.459		>20	>20		0.023	0.091		7.994	>20		7.7	>50		0.007	0.195		0.059	1.476		0.006	0.023		0.546	16.327
TRP307.2.00_24_1	0.29	1.01		0.05	0.234		0.125	0.556		0.045	0.22		0.076	0.262		0.077	0.37		<0.0003	0.001		4.524	>50		0.0002	0.001		0.034	0.158
TRP363.2.00_10_3	2.12	>10		0.16	1.196		0.286	1.502		0.148	0.714		0.036	0.103		0.007	0.033		1.228	>25		19.51	>50		0.013	0.044		0.043	0.271
722_G4_16	>10	>10		0.054	0.213		4.086	>20		0.091	0.32		0.006	0.023		0.014	0.048		>25	>25		0.369	1.24		0.002	0.005		0.15	0.63
So431_C1_1	0.56	3.64		0.012	0.062		0.198	5.198		0.003	0.02		>20	>20		0.028	0.183		>25	>25		>50	>50		0.007	0.032		0.083	0.375
So405_T24_5	3.41	>10		0.459	1.807		0.33	0.872		0.279	1.274		0.001	0.005		0.005	0.019		>25	>25		>50	>50		0.002	0.006		0.148	0.518
CT072_56_7	0.06	0.31		0.029	0.098		0.014	0.037		0.019	0.046		0.002	0.006		0.001	0.006		0.002	24.704		0.005	4.784		0.0001	0.001		0.009	0.033
CT966_E1-7	0.56	2.94		0.072	0.379		0.2	0.702		0.038	0.156		>20	>20		7.81	>50		<0.0003	0.013		0.006	0.026		0.008	0.047		0.106	0.407
CT140_140_B6	>10	>10		0.103	0.579		0.126	0.537		0.06	0.296		0.069	0.3		0.007	0.031		0.012	0.089		0.59	2.217		0.0005	0.002		0.08	0.232
Ko426_T78_10	0.4	2.3		0.185	0.685		0.107	0.351		0.059	0.273		0.049	0.131		10.178	>50		>25	>25		>50	>50		0.002	0.004		0.034	0.095
Ko459_T68_4	1.27	5.57		0.12	0.539		0.173	0.57		0.156	0.415		0.043	0.117		0.038	0.357		<0.0003	0.005		0.002	0.021		0.004	0.016		0.044	0.201
Ko870_C2_10	0.23	0.87		0.03	0.138		0.131	0.433		0.042	0.117		>20	>20		>50	>50		<0.0003	<0.0003		0.01	0.334		0.0005	0.001		0.081	0.377
CA392_H2_6	0.18	0.81		0.088	0.319		0.036	0.134		0.186	0.628		0.086	0.319		0.765	4.695		0.112	>25		0.095	0.793		0.01	0.022		0.018	0.07
CA146_H3_3	>10	>10		0.091	0.325		0.578	1.968		0.388	1.826		0.013	0.047		0.007	0.021		0.053	>25		>50	>50		0.0004	0.002		0.132	0.697
CA240_A5.5	1.33	4.95		0.143	0.428		0.631	3.391		0.082	0.229		0.004	0.014		<0.001	0.007		>25	>25		>50	>50		0.006	0.029		0.011	0.065
2865_A11.12	0.88	3.32		0.113	0.552		0.268	1.198		0.135	0.5		2.057	6.61		1.175	5.495		0.123	>25		0.213	0.719		0.001	0.004		0.213	0.977
3603_C11.13	0.31	0.98		0.048	0.199		0.015	0.056		0.045	0.128		0.027	0.101		0.035	0.123		>25	>25		6.223	40.279		>10	>10		0.016	0.065
3312_D6.2	0.18	0.81		0.035	0.145		0.828	9.739		0.065	0.174		0.043	0.149		>50	>50		<0.0003	0.001		0.006	0.019		0.006	0.02		0.055	0.205
CAP304.2.00_F6.6	0.04	0.13		0.008	0.021		1.282	>20		0.009	0.027		0.678	4.313		0.146	0.525		<0.0003	<0.0003		0.043	0.561		0.001	0.004		0.488	>25
CAP308.2.00_E11.35	>10	>10		>25	>25		>20	>20		>50	>50		0.533	2.991		2.51	10.48		<0.0003	<0.0003		<0.001	0.004		0.003	0.008		0.194	0.665
CAP323.2.00_B6.45	>10	>10		0.053	0.288		0.141	0.714		0.145	0.669		0.105	1.52		0.037	0.382		<0.0003	<0.0003		0.007	0.023		0.002	0.005		0.052	0.361
CAP330.2.00_F2.41	0.56	8.71		0.002	0.01		>20	>20		0.003	0.012		>20	>20		>50	>50		<0.0003	0.002		0.002	0.013		0.0002	0.001		>25	>25
20417927.07	>10	>10		>25	>25		>20	>20		>50	>50		>20	>20		>50	>50		0.001	0.043		0.994	>50		0.003	0.008		>25	>25
20358510.01	0.39	1.41		0.012	0.044		0.192	1.459		0.074	0.204		8.535	>20		6.401	>50		<0.0003	<0.0003		0.016	0.186		0.002	0.008		0.027	0.146
1170887.08	0.11	0.42		0.004	0.031		0.004	0.014		0.001	0.005		>20	>20		>50	>50		0.017	6.095		0.034	0.573		0.005	0.021		0.005	0.038
B005018-8_F6.3	0.28	1		0.118	0.388		0.093	0.405		0.051	0.174		>20	>20		17.366	>50		<0.0003	0.001		<0.001	0.011		0.001	0.005		0.039	0.182
CT810_G4-7	0.51	1.92		0.093	0.629		1.191	8.124		0.1	0.45		0.264	0.912		0.04	0.286		0.066	>25		4.213	>50		0.001	0.003		0.149	0.648
CT184_D3.15	0.1	0.36		0.012	0.084		0.133	0.925		0.032	0.087		0.002	0.007		<0.001	0.002		0.002	0.386		0.006	0.041		0.021	0.098		0.005	0.018
SO607_B6.9	0.49	1.74		0.059	0.288		0.124	0.433		0.131	0.347		>20	>20		>50	>50		>25	>25		>50	>50		0.003	0.009		0.044	0.309
Me178_G6.16	0.4	1.38		0.047	0.317		0.425	2.1		0.119	0.52		0.018	0.055		0.077	0.574		0.643	>25		0.02	0.131		0.001	0.004		0.079	0.373
CAP291.2.00_H2.15	0.58	1.56		0.023	0.113		0.095	0.41		0.13	0.416		0.083	0.276		0.016	0.075		>25	>25		0.947	2.712		0.002	0.007		0.072	0.212
SO032_A2.8-1	1.98	>10		0.101	1.223		4.873	>20		0.147	0.533		0.005	0.015		0.003	0.012		<0.0003	<0.0003		>50	>50		0.0003	0.002		0.018	0.081
CT565_C7.48	>10	>10		0.513	9.054		>20	>20		5.233	22.04		2.97	15.079		11.892	>50		<0.0003	<0.0003		0.019	0.299		0.024	0.1		>25	>25
CH0505.w4.3	0.022	0.11		0.013	0.071		0.011	0.034		0.01	0.027		>20	>20		>50	>50		>25	>25		0.01	0.032		0.036	0.178		0.017	0.109
6022.v7.c24	1.976	6.98		0.101	1.001		0.021	0.098		0.842	2.746		0.017	0.046		0.034	0.121		<0.0003	0.187		>50	>50		0.002	0.008		0.185	0.66
6146.v7.c23	0.898	5.21		0.132	0.696		>20	>20		0.083	0.223		0.002	0.008		0.002	0.01		<0.0003	0.019		0.071	1.354		0.009	0.032		>25	>25
CH064.env	>10	>10		0.111	0.859		0.647	5.333		0.076	0.235		0.246	0.839		0.245	1.14		0.003	0.044		1.032	10.542		0.004	0.009		0.12	0.76
